# Supplementary material for: YouTube as a Source of Patient Information Regarding Exercises and Compensated Maneuvers for Dysphagia
Source: MDPI journal article supplement (doi:10.3390/healthcare9081084), 2021-08-23
Supplement: s1 [file s1]

**Supplementary Table S1.** Global quality scale

- 
- |                                                                                      |
|--------------------------------------------------------------------------------------|
| 1. Poor quality, poor flow, most information missing, not helpful for patients       |
| 2. Generally poor, some information given but of limited use to patients             |
| 3. Moderate quality, some important information is adequately discussed              |
| 4. Good quality good flow, most relevant information is covered, useful for patients |
| 5. Excellent quality and excellent flow, very useful for patients                    |
- 

**Supplementary Table S2.** DISCERN reliability tool

- 
- |                                                                               |
|-------------------------------------------------------------------------------|
| 1. Is the video clear, concise, and understandable?                           |
| 2. Are valid sources cited? (from valid studies, physiatrists, or physicians) |
| 3. Is the information provided balanced and unbiased?                         |
| 4. Are additional sources of information listed for patient reference?        |
| 5. Does the video address areas of controversy/uncertainty?                   |
-
